# Supplementary material for: A De-O-acylated Lipooligosaccharide-Based Adjuvant System Promotes Antibody and Th1-Type Immune Responses to H1N1 Pandemic Influenza Vaccine in Mice
Source: Hindawi journal article supplement (doi:10.1155/2016/3713656), 2016-01-01
Supplement: f1 [file 3713656.f1.pdf]

657

**Supporting Information**

658

**Table S1. Primers used for forward and reverse RT-PCR.**

659

| Target gene    | Accession number | PCR primer sequences (5'-3')                                            | Product size (bp) |
|----------------|------------------|-------------------------------------------------------------------------|-------------------|
| <i>β-actin</i> | NM_007393        | F 5'- TGGAATCCTGTGGCATCCATGA -3'<br>R 5'- TCTTGATCTTCATGGTGCTAGG -3'    | 180               |
| <i>TNF-α</i>   | NM_013693        | F 5'- ATGAGCACAGAAAGCATGATC -3'<br>R 5'- GTTCAGTAGACAGAAGAGCG -3'       | 156               |
| <i>IFN-γ</i>   | NM_008337        | F 5'- GGATATCTGGAGGAACTGGCAA -3'<br>R 5'- CCTCAAACCTTGGCAATACTCATG -3'  | 209               |
| <i>IL-6</i>    | NM_031168        | F 5'- CTTCCATCCAGTTGCCTTCTT -3'<br>R 5'- ACGATTTCCCAGAGAACATGT -3'      | 165               |
| <i>IL-12</i>   | NM_008352        | F 5'- CAAGACTTTCCTGAAGTGTGAAG -3'<br>R 5'- AATGGCGTCTCTGTCTGCAGAGAA -3' | 162               |
| <i>IFN-β</i>   | NM_010510        | F 5'- ACTATAAGCAGCTCCAGCTC -3'<br>R 5'- AAGACATTCTGGAGCATCTC -3'        | 184               |
| <i>MCP-1</i>   | NM_011333        | F 5'- ACTCACCTGCTGCTACTCAT -3'<br>R 5'- TCAGCACAGACCTCTCTCTT -3'        | 138               |
| <i>RANTES</i>  | NM_013653        | F 5'- ACCATATGGCTCGGACACCA -3'<br>R 5'- TTCTCTGGGTTGGCACACAC -3'        | 162               |

660
